# Supplementary material for: Global emissions of VOCs from compressed aerosol products
Source: Oxford University Press journal article supplement (doi:10.1525/elementa.2020.20.00177), 2021-01-01
Supplement: supplementary_information.docx [file supplementary_information.docx]

**Supplementary Information**

**Global emissions of VOCs from compressed aerosol products**

Amber M Yeoman1 and Alastair C Lewis2 *

[1] Wolfson Atmospheric Chemistry Laboratories, University of York, Heslington, York YO10 5DD United Kingdom

[2] National Centre for Atmospheric Science, University of York, Heslington, York YO10 5DD, United Kingdom

*ally.lewis@ncas.ac.uk

**List of contents:**

**Figure S1: European aerosol production breakdown**

For the years 2016-2018, using data provided by the European Aerosol Federation (FEA).

File Type: PNG Document (.png)

**Table S1:** **Economic classifications according to The World Bank**

Data determined using the World Bank Atlas method.

File type: Microsoft Word (.doc)


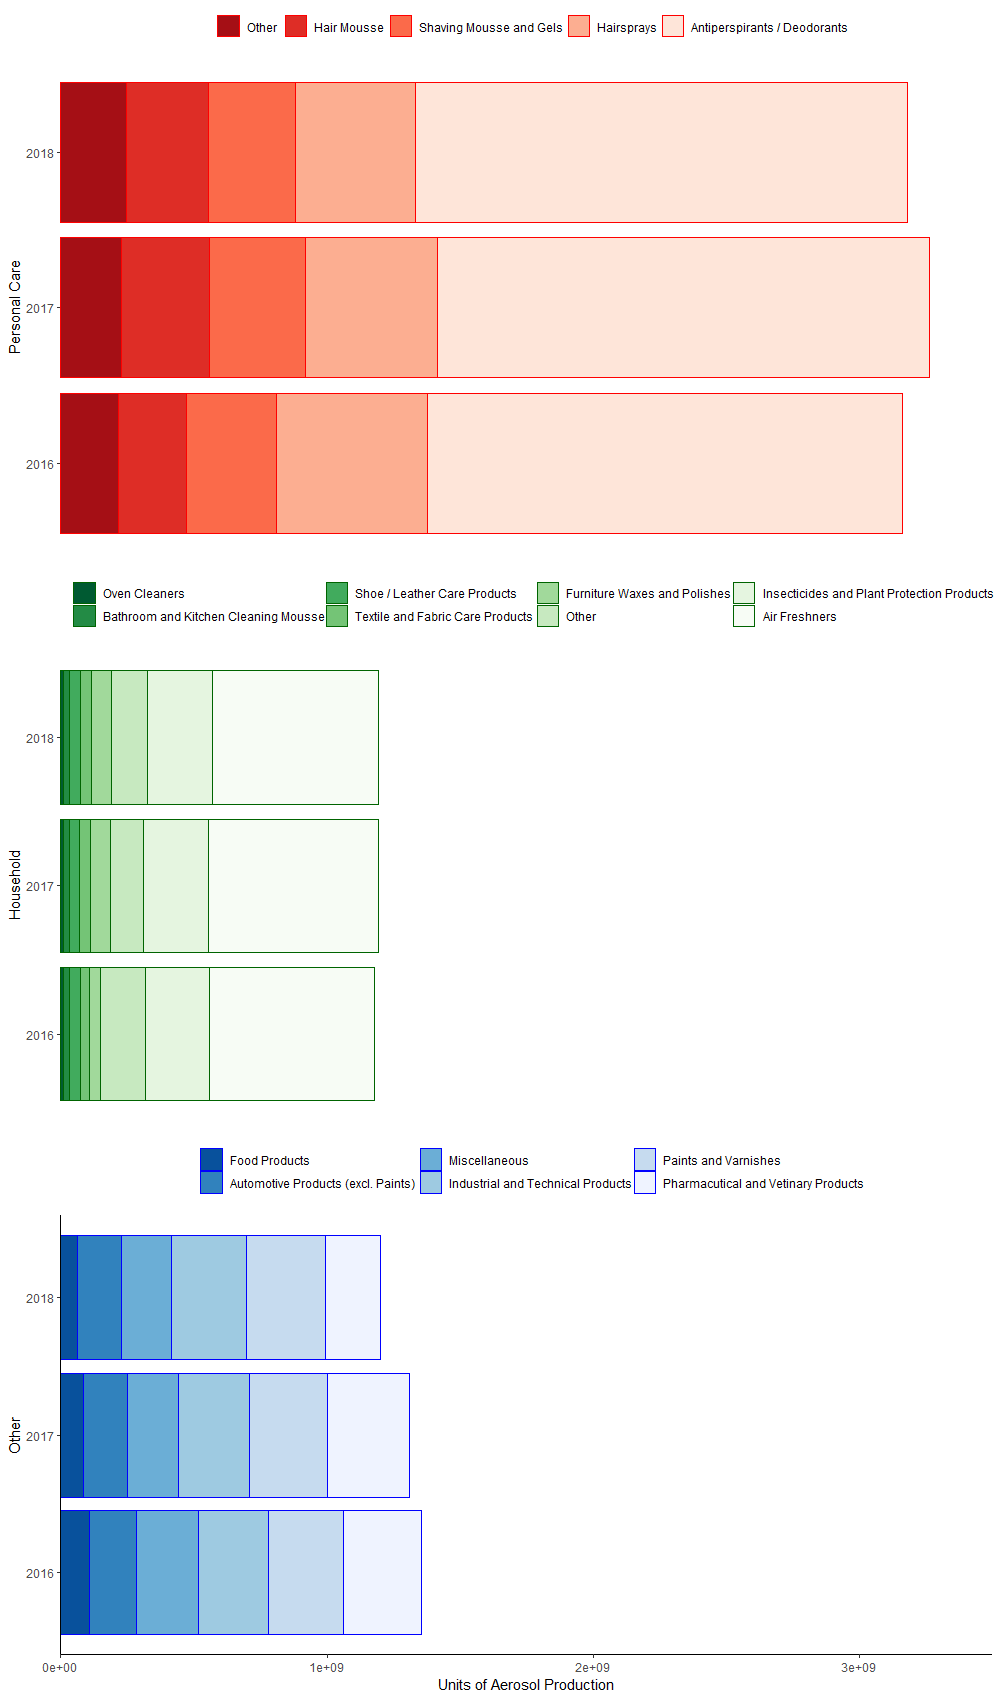


**Figure S1: European aerosol production breakdown**

For the years 2016-2018, using data provided by the European Aerosol Federation (FEA).

**Table S1**: **Economic classifications according to The World Bank**

Data determined using the World Bank Atlas method.

| **Low** | **Lower Middle** | **Upper Middle** | **High** |
| --- | --- | --- | --- |
| Afghanistan | Angola | Albania a | Andorra a |
| Burkina Faso | Algeria | American Samoa | Antigua and Barbuda |
| Burundi | Bangladesh | Argentina | Aruba |
| Central African Republic | Benin | Armenia | Australia |
| Chad | Bhutan | Azerbaijan | The Bahamas |
| DR Congo | Bolivia | Belarus a | Bahrain |
| Eritrea | Cabo Verde | Bosnia and Herzegovina a | Barbados |
| Ethiopia | Cambodia | Botswana | Belgium a |
| Gambia | Cameroon | Brazil | Bermuda |
| Guinea | Comoros | Bulgaria a | British Virgin Islands |
| Guinea-Bissau | Rep Congo | China | Brunei Darussalam |
| Haiti | Cote d'Ivoire | Colombia | Canada |
| PDR Korea | Djibouti | Costa Rica | Cayman Islands |
| Liberia | AR Egypt | Cuba | Channel Islands a |
| Madagascar | El Salvador | Dominica | Chile |
| Malawi | Eswatini | Dominican Republic | Croatia a |
| Mali | Ghana | Equatorial Guinea | Curacao |
| Mozambique | Honduras | Ecuador | Cyprus a |
| Niger | India | Fiji | Czech Republic a |
| Rwanda | Kenya | Gabon | Denmark a |
| Sierra Leone | Kiribati | Georgia | Estonia a |
| Somalia | Kyrgyz Rep | Guatemala | Faroe Islands a |
| South Sudan | Lao PDR | Guyana | Finland a |
| Sudan | Lesotho | Indonesia | France a |
| Syrian AR | Mauritania | Iran Islamic Rep | French Polynesia |
| Tajikistan | Micronesia Def Sts | Iraq | Germany a |
| Togo | Moldova a | Jamaica | Gibraltar a |
| Uganda | Mongolia | Jordan | Greece a |
| Yemen | Morocco | Kazakhstan | Greenland a |
|  | Myanmar | Kosovo a | Guam |
|  | Nepal | Lebanon | Hong Kong SAR b |
|  | Nicaragua | Libya | Hungary a |
|  | Nigeria | Malaysia | Iceland a |
|  | Pakistan | Maldives | Ireland a |
|  | Papua New Guinea | Marshall Islands | Isle of Man a |
|  | Philippines | Mexico | Israel |
|  | Sao Tome and Principe | Montenegro a | Italy a |
|  | Senegal | Namibia | Japan |
|  | Solomon Islands | North Macedonia a | Korea Rep |
|  | Sri Lanka | Paraguay | Kuwait |
|  | Tanzania | Peru | Latvia a |
|  | Timor-Leste | Russian Federation a | Liechtenstein a |
|  | Tunisia | Samoa | Lithuania a |
|  | Ukraine a | Serbia a | Luxembourg a |
|  | Uzbekistan | South Africa | Macao SAR b |
|  | Vanuatu | St. Lucia | Malta a |
|  | Vietnam | St. Vincent and the Grenadines | Mauritius |
|  | West Bank and Gaza | Suriname | Monaco a |
|  | Zambia | Thailand | Nauru |
|  | Zimbabwe | Tonga | Netherlands a |
|  |  | Turkey a | New Caledonia |
|  |  | Turkmenistan | New Zealand |
|  |  | Tuvalu | Northern Mariana Islands |
|  |  | Venezuela RB | Norway a |
|  |  |  | Oman |
|  |  |  | Palau |
|  |  |  | Panama |
|  |  |  | Poland a |
|  |  |  | Portugal a |
|  |  |  | Puerto Rico |
|  |  |  | Romania a |
|  |  |  | Qatar |
|  |  |  | San Marino a |
|  |  |  | Saudi Arabia |
|  |  |  | Seychelles |
|  |  |  | Singapore |
|  |  |  | Sint Maarten |
|  |  |  | Slovak Republic a |
|  |  |  | Slovenia a |
|  |  |  | Spain a |
|  |  |  | St. Kitts and Nevis |
|  |  |  | St. Martin |
|  |  |  | Sweden a |
|  |  |  | Switzerland a |
|  |  |  | Taiwan b |
|  |  |  | Trinidad and Tobago |
|  |  |  | Turks and Caicos Islands |
|  |  |  | United Arab Emirates |
|  |  |  | United Kingdom a |
|  |  |  | United States |
|  |  |  | Uruguay |
|  |  |  | Virgin Islands (U.S) |

a Included within the grouping of Europe

b Included in China’s total
